# Supplementary material for: A novel method for sensitive detection of Escherichia coli O157:H7 based on an aptamer and hybridization chain reaction
Source: Royal Society of Chemistry journal article supplement (doi:10.1039/d0ay00708k), 2020-01-01
Supplement: d0ay00708k1.xlsx [file d0ay00708k1.xlsx]

## Sheet: Sheet1
5	3868	120
10	1189	110
15	367	111
20	213	108
25	113	77
30	108	88
40	96	57
