# Supplementary material for: A novel method for sensitive detection of Escherichia coli O157:H7 based on an aptamer and hybridization chain reaction
Source: Royal Society of Chemistry journal article supplement (doi:10.1039/d0ay00708k), 2020-01-01
Supplement: d0ay00708k2.xlsx [file d0ay00708k2.xlsx]

## Sheet: Sheet1
10	1025	108
20	1554	120
30	2563	118
40	3578	106
50	3987	101
60	3845	99
70	4012	96
