# Supplementary material for: A novel method for sensitive detection of Escherichia coli O157:H7 based on an aptamer and hybridization chain reaction
Source: Royal Society of Chemistry journal article supplement (doi:10.1039/d0ay00708k), 2020-01-01
Supplement: d0ay00708k3.xlsx [file d0ay00708k3.xlsx]

## Sheet: Sheet1
10	2034	101
20	2267	119
30	2768	102
40	3456	108
50	3985	102
60	4023	100
70	4100	99
