# Supplementary material for: A novel method for sensitive detection of Escherichia coli O157:H7 based on an aptamer and hybridization chain reaction
Source: Royal Society of Chemistry journal article supplement (doi:10.1039/d0ay00708k), 2020-01-01
Supplement: d0ay00708k4.xlsx [file d0ay00708k4.xlsx]

## Sheet: Sheet1
30	200	120
40	1533	118
60	2885	120
90	3742	115
120	3678	96
180	3645	94
