# Supplementary material for: A novel method for sensitive detection of Escherichia coli O157:H7 based on an aptamer and hybridization chain reaction
Source: Royal Society of Chemistry journal article supplement (doi:10.1039/d0ay00708k), 2020-01-01
Supplement: d0ay00708k5.xlsx [file d0ay00708k5.xlsx]

## Sheet: Sheet1
500
500.5
501
501.5
502
502.5
503
503.5
504
504.5
505
505.5
506
506.5
507
507.5
508
508.5
509
509.5
510
510.5
511
511.5
512
512.5
513
513.5
514
514.5
515
515.5
516
516.5
517
517.5
518
518.5
519
519.5
520
520.5
521
521.5
522
522.5
523
523.5
524
524.5
525
525.5
526
526.5
527
527.5
528
528.5
529
529.5
530
530.5
531
531.5
532
532.5
533
533.5
534
534.5
535
535.5
536
536.5
537
537.5
538
538.5
539
539.5
540
540.5
541
541.5
542
542.5
543
543.5
544
544.5
545
545.5
546
546.5
547
547.5
548
548.5
549
549.5
550
550.5
551
551.5
552
552.5
553
553.5
554
554.5
555
555.5
556
556.5
557
557.5
558
558.5
559
559.5
560
560.5
561
561.5
562
562.5
563
563.5
564
564.5
565
565.5
566
566.5
567
567.5
568
568.5
569
569.5
570
570.5
571
571.5
572
572.5
573
573.5
574
574.5
575
575.5
576
576.5
577
577.5
578
578.5
579
579.5
580
580.5
581
581.5
582
582.5
583
583.5
584
584.5
585
585.5
586
586.5
587
587.5
588
588.5
589
589.5
590
590.5
591
591.5
592
592.5
593
593.5
594
594.5
595
595.5
596
596.5
597
597.5
598
598.5
599
599.5
600
600.5
601
601.5
602
602.5
603
603.5
604
604.5
605
605.5
606
606.5
607
607.5
608
608.5
609
609.5
610
610.5
611
611.5
612
612.5
613
613.5
614
614.5
615
615.5
616
616.5
617
617.5
618
618.5
619
619.5
620
620.5
621
621.5
622
622.5
623
623.5
624
624.5
625
625.5
626
626.5
627
627.5
628
628.5
629
629.5
630
630.5
631
631.5
632
632.5
633
633.5
634
634.5
635
635.5
636
636.5
637
637.5
638
638.5
639
639.5
640
640.5
641
641.5
642
642.5
643
643.5
644
644.5
645
645.5
646
646.5
647
647.5
648
648.5
649
649.5
650
650.5

## Sheet: 横坐标不动
X轴	Y轴（0）	Y轴（1）	Y轴（2）	Y轴（3）	Y轴（4）	Y轴（5）	Y轴（6）	Y轴（7）	Y轴（8）
500	30.928	53.928	179.762	379.547	559.309	1023.84	1330.99	1597.19	1916.62
500.5	40.288	60.288	182.762	385.881	659.466	1044.76	1358.18	1629.82	1955.78
501	40.648	60.648	185.762	392.215	675.466	1065.67	1385.37	1662.45	1994.94
501.5	41.008	61.008	188.762	398.55	691.466	1086.59	1412.57	1695.08	2034.09
502	41.368	61.368	191.762	404.884	707.466	1107.51	1439.76	1727.71	2073.25
502.5	41.728	61.728	194.762	411.218	723.466	1128.42	1466.95	1760.34	2112.41
503	42.088	42.088	197.762	417.552	739.466	1149.34	1494.14	1792.97	2151.56
503.5	43.45	22.448	200.762	423.886	755.466	1170.26	1521.33	1825.6	2190.72
504	44.343	20.808	205.762	434.443	771.466	1191.17	1548.53	1858.23	2229.88
504.5	45.354	19.168	210.762	446.06	787.466	1212.09	1575.72	1890.86	2269.03
505	46.13	17.528	212.762	457.557	803.466	1233.01	1602.91	1923.49	2308.19
505.5	47.87	15.888	214.762	469.114	819.466	1253.92	1630.1	1956.12	2347.35
506	48.352	19.947	216.762	480.671	835.466	1274.84	1657.29	1988.75	2386.5
506.5	49.834	24.005	218.762	492.228	851.466	1295.76	1684.48	2021.38	2425.66
507	50.354	28.063	220.762	503.785	867.466	1316.67	1711.68	2054.01	2464.82
507.5	49.121	32.121	224.762	515.342	883.466	1337.59	1738.87	2086.64	2503.97
508	48.179	36.179	228.762	526.899	899.466	1358.51	1766.06	2119.27	2543.13
508.5	50.237	40.237	232.762	538.456	915.466	1379.42	1793.25	2151.9	2582.28
509	47.295	44.295	236.762	572.924	931.466	1400.34	1820.44	2184.53	2621.44
509.5	48.353	48.353	240.762	588.481	947.466	1421.26	1847.64	2217.16	2660.6
510	49.411	52.411	244.762	604.038	963.466	1442.18	1874.83	2249.8	2699.75
510.5	50.469	56.469	248.762	619.595	979.466	1463.09	1902.02	2282.43	2738.91
511	54.252	74.252	252.762	635.152	995.466	1484.01	1929.21	2315.05	2778.07
511.5	55.522	75.522	256.762	650.709	1011.47	1504.93	1956.4	2347.69	2817.22
512	56.793	76.793	276.711	666.266	1027.47	1525.84	1983.6	2380.32	2856.38
512.5	56.193	76.193	284.151	681.823	1043.47	1546.76	2010.79	2412.95	2895.54
513	55.593	75.593	291.591	697.38	1059.47	1567.68	2037.98	2445.58	2934.69
513.5	54.993	74.993	299.031	712.937	1075.47	1588.59	2065.17	2478.21	2973.85
514	54.393	74.393	306.472	728.494	1091.47	1609.51	2092.36	2510.84	3013.01
514.5	53.793	73.793	313.912	744.051	1107.47	1630.43	2119.56	2543.47	3052.16
515	53.193	73.193	321.352	759.608	1123.47	1651.35	2146.75	2576.1	3091.32
515.5	52.593	72.593	328.792	775.164	1139.47	1672.26	2173.94	2608.73	3130.47
516	51.993	71.993	336.232	790.721	1155.47	1693.18	2201.13	2641.36	3169.63
516.5	51.393	71.393	343.673	806.278	1171.47	1714.1	2228.32	2673.99	3208.79
517	50.793	70.793	351.113	821.835	1187.47	1735.01	2255.52	2706.62	3247.94
517.5	50.193	70.193	358.553	837.392	1203.47	1755.93	2282.71	2739.25	3287.1
518	49.593	69.593	365.993	852.949	1219.47	1776.85	2309.9	2771.88	3326.26
518.5	48.993	68.993	373.433	868.506	1235.47	1797.76	2337.09	2804.51	3365.41
519	48.393	68.393	380.874	884.063	1251.47	1818.68	2364.28	2837.14	3404.57
519.5	47.793	67.793	388.314	899.62	1267.47	1839.6	2391.48	2869.77	3443.73
520	47.193	67.193	395.754	915.177	1283.47	1860.51	2418.67	2902.4	3482.88
520.5	46.593	66.593	403.194	930.734	1299.47	1881.43	2445.86	2935.03	3522.04
521	45.993	65.993	410.634	946.291	1315.47	1902.35	2473.05	2967.66	3561.2
521.5	45.393	65.393	418.075	961.848	1331.47	1923.27	2500.24	3000.29	3600.35
522	44.793	64.793	425.515	977.405	1344.47	1944.18	2527.44	3032.92	3639.51
522.5	28.593	48.593	432.955	990.962	1357.47	1965.1	2554.63	3065.55	3678.66
523	26.993	46.993	445.395	1004.52	1370.47	1986.02	2581.82	3098.18	3717.82
523.5	25.393	45.393	457.835	1018.08	1383.47	2006.93	2609.01	3130.82	3756.98
524	23.793	43.793	470.276	1031.63	1396.47	2027.85	2636.2	3163.45	3796.13
524.5	22.193	42.193	482.716	1045.19	1409.47	2048.77	2663.4	3196.08	3835.29
525	20.593	40.593	489.156	1058.75	1422.47	2069.68	2690.59	3228.71	3874.45
525.5	21.679	41.679	495.596	1069.3	1435.47	2090.6	2717.78	3261.34	3913.6
526	22.765	42.765	502.036	1079.86	1448.47	2111.52	2744.97	3293.97	3952.76
526.5	23.851	43.851	508.477	1090.42	1457.47	2124.43	2761.76	3314.12	3976.94
527	24.938	44.938	515.917	1100.97	1466.47	2137.35	2778.56	3334.27	4001.12
527.5	26.024	46.024	519.357	1111.53	1475.47	2150.27	2795.35	3354.42	4025.3
528	27.11	47.11	530.797	1120.72	1484.47	2163.18	2812.14	3374.57	4049.48
528.5	28.197	48.197	533.237	1125.87	1493.47	2170.1	2821.13	3385.36	4062.43
529	29.283	49.283	535.678	1129.03	1502.47	2177.02	2830.12	3396.15	4075.38
529.5	30.369	50.369	539.118	1138.29	1511.47	2180.94	2835.22	3402.26	4082.71
530	31.456	51.456	540.515	1141.24	1513.38	2186.59	2842.96	3412.08	4100.75
530.5	32.542	52.542	542.194	1144.78	1515.47	2189.61	2846.9	3416.8	4106.43
531	33.628	53.628	543.873	1148.33	1514.93	2188.83	2845.88	3415.58	4104.96
531.5	34.714	54.714	542.552	1145.54	1514.45	2188.13	2844.97	3414.49	4103.64
532	35.801	55.801	538.194	1136.34	1514.45	2188.13	2844.97	3414.49	4103.64
532.5	36.887	56.887	533.836	1127.14	1514.45	2188.13	2844.97	3414.49	4103.64
533	37.973	57.973	529.478	1117.93	1516.26	2190.76	2848.38	3418.58	4108.56
533.5	39.06	59.06	525.12	1108.73	1509.34	2180.22	2835.38	3402.98	4089.81
534	40.146	60.146	520.762	1099.53	1503.8	2172.76	2824.98	3390.49	4074.81
534.5	41.232	61.232	516.404	1090.33	1498.27	2164.76	2814.58	3378.01	4059.8
535	42.319	62.319	510.046	1076.91	1488.58	2150.76	2796.38	3356.16	4033.55
535.5	43.405	63.405	503.688	1063.48	1478.89	2136.76	2778.17	3334.32	4007.29
536	44.491	64.491	497.33	1050.06	1469.2	2122.76	2759.97	3312.47	3981.04
536.5	45.577	65.577	490.972	1036.63	1459.51	2108.26	2741.77	3290.62	3954.78
537	46.664	66.664	484.614	1023.21	1449.82	2094.76	2723.57	3268.78	3928.53
537.5	47.75	67.75	478.256	1009.78	1440.13	2080.76	2705.36	3246.93	3902.27
538	48.836	68.836	471.898	996.361	1430.44	2066.76	2687.16	3225.09	3876.01
538.5	49.923	69.923	465.54	982.937	1420.75	2052.76	2668.96	3203.24	3849.76
539	51.009	71.009	459.182	969.512	1417.98	2048.76	2663.76	3197	3842.26
539.5	52.095	72.095	452.824	956.088	1408.29	2034.76	2645.55	3175.15	3816
540	53.182	73.182	446.466	942.664	1398.6	2020.76	2627.35	3153.3	3789.75
540.5	54.268	74.268	440.108	929.24	1388.91	2006.77	2609.15	3131.46	3763.49
541	54.168	74.168	433.75	915.815	1379.22	1992.76	2590.95	3109.61	3737.23
541.5	54.068	74.068	427.392	902.391	1369.53	1978.76	2572.74	3087.77	3710.98
542	53.968	73.968	421.034	888.967	1352.92	1954.76	2541.54	3050.32	3665.97
542.5	53.868	73.868	414.676	875.543	1350.15	1950.76	2536.34	3044.07	3658.47
543	53.768	73.768	408.318	862.119	1340.46	1936.76	2518.14	3022.23	3632.21
543.5	53.668	73.668	401.96	848.694	1330.78	1922.76	2499.93	3000.38	3605.95
544	53.568	73.568	395.602	835.27	1321.09	1908.24	2481.73	2978.53	3579.7
544.5	53.468	73.468	389.244	821.846	1311.39	1894.76	2463.53	2956.69	3553.44
545	53.368	73.368	382.886	808.422	1301.71	1880.76	2445.33	2934.84	3527.19
545.5	53.268	73.268	376.528	794.997	1292.02	1866.76	2427.12	2912.99	3500.93
546	53.168	73.168	370.17	781.573	1282.33	1852.76	2408.92	2891.15	3474.68
546.5	53.068	73.068	363.812	768.149	1272.64	1838.76	2390.72	2869.3	3448.42
547	52.968	72.968	357.454	754.725	1262.95	1824.76	2372.52	2847.45	3422.16
547.5	52.868	72.868	351.096	741.301	1253.26	1810.76	2354.31	2825.61	3395.91
548	52.768	72.768	344.738	727.876	1239.41	1790.76	2328.31	2794.4	3358.4
548.5	52.668	72.668	338.38	714.452	1225.57	1770.76	2302.31	2763.19	3320.89
549	52.568	72.568	332.022	701.028	1212.73	1750.76	2276.3	2731.98	3283.39
549.5	52.468	72.468	325.664	687.604	1199.89	1730.76	2250.3	2700.77	3245.88
550	52.368	72.368	319.306	674.179	1187.05	1710.76	2224.3	2669.56	3208.37
550.5	52.268	72.268	312.948	660.755	1174.2	1690.76	2198.29	2638.35	3170.86
551	52.168	72.168	306.59	647.331	1161.36	1670.76	2172.29	2607.14	3133.35
551.5	52.068	72.068	300.232	633.907	1148.52	1650.76	2146.28	2575.94	3095.84
552	51.968	71.968	295.874	624.705	1135.68	1630.12	2120.28	2544.73	3058.34
552.5	51.868	71.868	291.516	615.504	1122.83	1610.76	2094.28	2513.52	3020.83
553	51.768	71.768	287.158	606.302	1109.99	1590.76	2068.27	2482.31	2983.32
553.5	51.668	71.668	282.8	597.101	1097.15	1570.76	2042.27	2451.1	2945.81
554	51.568	71.568	278.442	587.9	1084.31	1550.76	2016.27	2419.89	2908.3
554.5	51.468	71.468	274.084	578.698	1071.46	1530.76	1990.26	2388.68	2870.8
555	51.368	71.368	269.726	569.497	1058.62	1510.76	1964.26	2357.47	2833.29
555.5	51.268	71.268	265.368	560.295	1045.78	1490.76	1938.26	2326.26	2795.78
556	51.168	71.168	261.01	551.094	1032.94	1470.76	1912.25	2295.05	2758.27
556.5	51.068	71.068	256.652	541.892	1020.1	1450.76	1886.25	2263.84	2720.76
557	50.968	70.968	252.294	532.691	1007.25	1430.76	1860.24	2232.64	2683.25
557.5	50.868	70.868	247.936	523.489	994.41	1410.76	1834.24	2201.43	2645.74
558	50.768	70.768	243.578	514.288	983.568	1390.76	1808.24	2170.22	2608.24
558.5	50.168	70.168	239.22	505.087	972.725	1370.76	1782.23	2139.01	2570.73
559	49.568	69.568	234.862	495.885	961.883	1350.76	1756.23	2107.8	2533.22
559.5	48.968	68.968	230.504	489.684	951.04	1330.76	1730.23	2076.59	2495.71
560	48.368	68.368	226.146	483.482	940.198	1310.76	1704.22	2045.38	2458.2
560.5	47.768	67.768	221.788	477.281	929.356	1290.76	1678.22	2014.17	2420.7
561	47.168	67.168	217.43	471.079	918.513	1270.76	1652.21	1982.96	2383.19
561.5	46.568	66.568	213.072	464.878	907.671	1250.76	1626.21	1951.75	2345.68
562	45.968	65.968	208.714	458.676	896.829	1235.76	1606.71	1928.35	2317.55
562.5	45.368	65.368	207.356	452.475	885.986	1220.76	1587.21	1904.94	2289.42
563	44.768	64.768	205.998	446.274	875.144	1205.76	1567.7	1881.53	2261.29
563.5	44.168	64.168	204.64	440.072	864.302	1190.76	1548.2	1858.12	2233.16
564	43.568	63.568	203.282	433.871	853.459	1175.76	1528.7	1834.72	2205.02
564.5	42.968	62.968	201.924	427.669	842.617	1160.76	1509.19	1811.31	2176.89
565	42.368	62.368	200.566	421.468	831.774	1145.76	1489.69	1787.9	2148.76
565.5	41.768	61.768	199.208	415.266	820.932	1130.76	1470.19	1764.5	2120.63
566	41.168	61.168	197.85	409.065	810.09	1115.76	1450.69	1741.09	2092.5
566.5	40.568	60.568	196.492	402.863	799.247	1100.76	1431.18	1717.68	2064.37
567	39.968	59.968	195.134	396.662	788.405	1085.76	1411.68	1694.28	2036.24
567.5	39.368	59.368	193.776	390.461	777.563	1070.76	1392.18	1670.87	2008.11
568	38.768	58.768	192.418	384.259	766.72	1055.76	1372.68	1647.46	1979.97
568.5	38.168	58.168	191.06	378.058	755.878	1040.76	1353.17	1624.06	1951.84
569	37.568	57.568	189.702	371.856	745.036	1025.76	1333.67	1600.65	1923.71
569.5	36.968	56.968	188.344	365.655	734.193	1010.76	1314.17	1577.24	1895.58
570	36.096	56.096	186.986	359.453	723.351	995.756	1294.66	1553.84	1867.45
570.5	30.888	50.888	169.628	353.252	712.508	985.756	1281.66	1538.23	1848.7
571	29.881	49.881	166.27	347.05	701.666	975.756	1268.66	1522.63	1829.94
571.5	29.174	49.174	163.912	346.082	690.824	965.756	1255.66	1507.02	1811.19
572	28.466	48.466	161.554	341.103	683.981	955.756	1242.66	1491.42	1792.43
572.5	27.759	47.759	159.196	336.125	677.139	945.756	1229.66	1475.81	1773.68
573	27.051	47.051	156.838	331.146	670.297	935.756	1216.65	1460.21	1754.93
573.5	26.661	46.661	155.538	328.401	663.454	925.756	1203.65	1444.6	1736.17
574	26.271	46.271	154.238	325.656	656.612	915.756	1190.65	1429	1717.42
574.5	25.881	45.881	152.938	322.912	649.769	905.756	1177.65	1413.39	1698.66
575	25.491	45.491	151.638	320.167	642.927	895.756	1164.65	1397.79	1679.91
575.5	25.101	45.101	150.338	317.422	636.085	885.756	1151.64	1382.18	1661.15
576	24.711	44.711	149.038	314.677	629.242	875.756	1138.64	1366.58	1642.4
576.5	24.321	44.321	147.738	311.932	622.4	865.756	1125.64	1350.98	1623.65
577	23.931	43.931	146.438	309.187	615.558	855.756	1112.64	1335.37	1604.89
577.5	23.541	43.541	145.138	306.443	608.715	845.756	1099.64	1319.77	1586.14
578	23.151	43.151	143.838	303.698	601.873	835.756	1086.64	1304.16	1567.38
578.5	22.761	42.761	142.538	300.953	595.031	825.756	1073.63	1288.56	1548.63
579	22.371	42.371	141.238	298.208	588.188	815.756	1060.63	1272.95	1529.88
579.5	22.281	42.281	140.938	297.575	581.346	805.756	1047.63	1257.35	1511.12
580	22.191	42.191	140.638	296.941	574.503	795.756	1034.63	1241.74	1492.37
580.5	22.101	42.101	140.338	296.308	567.661	785.756	1021.63	1226.14	1473.61
581	22.011	42.011	140.038	295.675	560.819	775.756	1008.62	1210.54	1454.86
581.5	21.921	41.921	139.738	295.041	553.976	765.756	995.623	1194.93	1436.11
582	21.831	41.831	139.438	294.408	547.134	755.756	982.621	1179.33	1417.35
582.5	21.741	41.741	139.138	293.774	540.292	745.756	969.619	1163.72	1398.6
583	21.651	41.651	138.838	293.141	533.449	735.756	956.617	1148.12	1379.84
583.5	21.261	41.261	137.538	290.396	526.607	725.756	943.616	1132.51	1361.09
584	20.871	40.871	136.238	287.651	519.765	715.756	930.614	1116.91	1342.34
584.5	20.481	40.481	134.938	284.906	512.922	705.756	917.612	1101.3	1323.58
585	20.091	40.091	133.638	282.162	506.08	695.756	904.61	1085.7	1304.83
585.5	19.701	39.701	132.338	279.417	499.237	685.756	891.608	1070.09	1286.07
586	19.311	39.311	131.038	276.672	492.395	675.756	878.606	1054.49	1267.32
586.5	18.921	38.921	129.738	273.927	485.553	665.756	865.605	1038.88	1248.57
587	18.531	38.531	128.438	271.182	478.71	655.756	852.603	1023.28	1229.81
587.5	18.141	38.141	127.138	268.438	471.868	645.756	839.601	1007.67	1211.06
588	17.751	37.751	125.838	265.693	465.026	635.756	826.599	992.07	1192.3
588.5	17.361	37.361	124.538	262.948	458.183	625.756	813.597	976.466	1173.55
589	16.971	36.971	123.238	260.203	451.341	615.756	800.595	960.861	1154.8
589.5	16.581	36.581	121.938	257.458	444.498	605.756	787.594	945.257	1136.04
590	16.191	36.191	120.638	254.714	437.656	595.756	774.592	929.652	1117.29
590.5	15.801	35.801	119.338	251.969	430.814	585.756	761.59	914.047	1098.53
591	15.411	35.411	118.038	249.224	423.971	575.756	748.588	898.443	1079.78
591.5	15.021	35.021	116.738	246.479	417.129	568.756	739.487	887.52	1066.65
592	14.631	34.631	115.438	243.734	410.287	561.756	730.386	876.596	1053.52
592.5	14.241	34.241	114.138	240.99	403.444	554.756	721.284	865.673	1040.39
593	13.851	33.851	112.838	238.245	396.602	547.756	712.183	854.75	1027.27
593.5	13.461	33.461	111.538	235.5	389.76	540.756	703.082	843.827	1014.14
594	13.071	33.071	110.238	232.755	382.917	533.756	693.98	832.904	1001.01
594.5	12.681	32.681	108.938	230.01	376.075	526.756	684.879	821.98	987.883
595	12.291	32.291	107.638	227.265	369.232	519.756	675.778	811.057	974.755
595.5	11.901	31.901	106.338	224.521	362.39	512.756	666.677	800.134	961.627
596	11.511	31.511	105.038	221.776	355.548	505.756	657.575	789.211	948.499
596.5	11.121	31.121	103.738	219.031	348.705	498.756	648.474	778.288	935.372
597	10.731	30.731	102.438	216.286	341.863	491.756	639.373	767.364	922.244
597.5	10.341	30.341	101.138	213.541	335.021	484.756	630.271	756.441	909.116
598	9.951	29.951	99.838	210.797	328.178	477.756	621.17	745.518	895.988
598.5	9.561	29.561	98.538	208.052	321.336	470.756	612.069	734.595	882.86
599	9.171	29.171	97.238	205.307	314.494	463.756	602.968	723.672	869.732
599.5	9.741	29.741	99.138	209.319	307.651	456.756	593.866	712.748	856.604
600	8.912	28.912	96.374	203.484	311.284	449.756	584.765	701.825	843.477
600.5	8.13	28.13	93.767	197.979	306.439	442.756	575.664	690.902	830.349
601	7.277	27.277	90.922	191.972	301.595	435.756	566.562	679.979	817.221
601.5	6.563	26.563	88.543	186.949	296.75	428.756	557.461	669.056	804.093
602	5.734	25.734	85.779	181.114	291.905	421.756	548.36	658.132	790.965
602.5	5.02	25.02	83.401	176.092	287.06	414.756	539.259	647.209	777.837
603	4.191	24.191	80.637	170.256	282.215	407.756	530.157	636.286	764.709
603.5	13.409	23.409	78.03	164.752	277.37	400.756	521.056	625.363	751.581
604	12.555	22.555	75.185	158.744	272.526	393.756	511.955	614.44	738.454
604.5	11.842	21.842	72.806	153.722	267.681	386.756	502.853	603.516	725.326
605	11.013	21.013	70.042	147.887	262.836	379.756	493.752	592.593	712.198
605.5	10.798	20.798	69.327	146.377	257.991	372.756	484.651	581.67	699.07
606	10.603	20.603	68.677	145.005	253.146	365.756	475.55	570.747	685.942
606.5	10.427	20.427	68.089	143.762	248.301	358.756	466.448	559.823	672.814
607	10.267	20.267	67.557	142.639	243.457	351.756	457.347	548.9	659.686
607.5	10.198	19.877	66.257	139.894	238.612	344.756	448.246	537.977	646.558
608	10.078	19.516	65.052	137.351	233.767	337.756	439.144	527.054	633.431
608.5	10.035	19.182	63.94	135.003	228.922	330.756	430.043	516.131	620.303
609	10.76	18.875	62.916	132.841	224.077	323.756	420.942	505.207	607.175
609.5	11.534	18.31	61.034	128.868	219.232	316.756	411.841	494.284	594.047
610	11.67	17.734	59.112	124.808	214.388	309.756	402.739	483.361	580.919
610.5	10.243	17.377	57.922	122.297	209.543	302.756	393.638	472.438	567.791
611	10.429	16.962	56.541	119.379	204.698	295.756	384.537	461.515	554.663
611.5	10.535	16.571	55.237	116.627	199.853	288.756	375.435	450.591	541.536
612	9.43	16.144	53.814	113.623	195.008	281.756	366.334	439.668	528.408
612.5	9.344	15.788	52.625	111.112	190.164	274.756	357.233	428.745	515.28
613	9.65	15.373	51.243	108.194	185.319	267.756	348.132	417.822	502.152
613.5	8.564	15.016	50.054	105.683	180.474	260.756	339.03	406.899	489.024
614	8.56	14.602	48.672	102.766	175.629	253.756	329.929	395.975	475.896
614.5	8.751	14.211	47.368	100.013	170.784	246.756	320.828	385.052	462.768
615	7.53	13.854	46.179	97.502	165.939	239.756	311.726	374.129	449.64
615.5	7.621	13.439	44.797	94.585	161.095	232.756	302.625	363.206	436.513
616	7.385	13.048	43.494	91.832	156.25	225.756	293.524	352.283	423.385
616.5	7.171	12.621	42.071	88.823	151.405	218.756	284.423	341.359	410.257
617	6.976	12.265	40.882	86.317	146.56	211.756	275.321	330.436	397.129
617.5	6.784	11.85	39.43	83.332	141.715	204.756	266.22	319.513	384.001
618	6.596	11.493	38.311	80.889	136.87	197.756	257.119	308.59	370.873
618.5	6.411	11.079	36.929	77.971	132.026	190.756	248.018	297.666	357.745
619	6.23	10.688	35.625	75.219	127.181	183.756	238.916	286.743	344.617
619.5	6.053	10.429	34.765	73.402	122.336	176.756	229.815	275.82	331.49
620	5.978	10.194	33.979	71.744	117.491	169.756	220.714	264.897	318.362
620.5	5.904	9.804	32.679	68.998	112.646	162.756	211.612	253.974	305.234
621	5.83	9.442	31.475	66.455	107.801	155.756	202.511	243.05	292.106
621.5	5.756	9.109	30.363	64.107	102.957	148.756	193.41	232.127	278.978
622	5.681	8.802	29.339	61.945	98.112	141.756	189.309	221.204	265.85
622.5	5.607	8.468	28.227	59.597	93.267	134.756	185.207	210.281	252.722
623	5.533	8.161	27.203	57.435	88.422	127.756	181.106	199.358	239.595
623.5	5.459	7.879	26.263	55.451	83.577	120.756	177.005	188.434	226.467
624	5.384	7.621	25.402	53.634	78.732	113.756	172.903	177.511	213.339
624.5	5.31	7.385	24.617	51.976	73.888	106.756	168.802	166.588	200.211
625	5.236	7.171	23.902	50.466	69.043	99.756	164.701	155.665	187.083
625.5	5.162	6.976	23.252	49.094	66.274	95.756	160.6	149.423	179.581
626	5.088	6.784	22.614	47.746	63.506	91.756	156.498	143.181	174.08
626.5	5.013	6.596	21.987	46.423	60.737	87.756	152.397	136.939	168.578
627	4.939	6.411	21.372	45.124	57.969	83.756	148.296	130.697	163.076
627.5	4.865	6.23	20.768	43.849	55.26	79.756	144.194	124.456	157.575
628	4.791	6.053	20.175	42.598	53.124	76.756	140.093	119.774	152.073
628.5	4.716	5.978	19.895	41.972	51.048	73.756	135.992	117.093	146.572
629	4.642	5.904	19.614	41.346	48.971	70.756	131.891	114.411	141.07
629.5	4.568	5.83	19.333	40.719	46.895	67.756	127.789	111.73	135.568
630	4.494	5.756	19.052	40.093	44.819	64.756	123.688	109.049	130.067
630.5	4.419	5.681	18.771	39.467	42.742	61.756	119.587	106.367	124.565
631	4.345	5.607	18.491	38.841	40.666	58.756	115.485	103.686	119.063
631.5	4.271	5.533	18.21	38.214	38.59	55.756	111.384	101.005	113.562
632	4.197	5.459	17.929	37.588	36.513	52.756	107.283	98.323	108.06
632.5	4.122	5.384	17.648	36.962	34.437	49.756	103.182	95.642	102.558
633	4.048	5.31	17.367	36.335	32.361	46.756	99.08	92.96	97.057
633.5	3.974	5.236	17.087	35.709	30.976	44.756	94.979	90.279	94.555
634	3.83	5.162	16.806	35.083	29.592	42.756	90.878	87.598	92.054
634.5	3.825	5.088	16.525	34.456	28.208	40.756	86.776	84.916	89.552
635	3.751	5.013	16.244	33.83	26.824	38.756	82.675	82.235	87.05
635.5	3.677	4.939	15.963	33.204	25.439	36.756	78.574	79.554	84.549
636	3.603	4.865	15.683	32.578	24.055	34.756	74.473	76.872	82.047
636.5	3.528	4.791	15.402	31.951	22.671	32.756	70.371	74.191	79.545
637	3.454	4.716	15.121	31.325	21.287	30.756	66.27	71.509	77.044
637.5	3.38	4.642	14.84	30.699	19.902	28.756	62.169	68.828	74.542
638	3.306	4.568	14.559	30.072	18.518	26.756	58.067	66.147	72.04
638.5	3.232	4.494	14.279	29.446	17.134	24.756	53.966	63.465	69.539
639	3.157	4.419	13.998	28.82	15.75	22.756	49.865	60.784	67.037
639.5	3.083	4.345	13.717	28.194	14.365	20.756	45.764	58.103	64.535
640	3.009	4.271	13.436	27.567	12.981	18.756	41.662	55.421	62.034
640.5	2.935	4.197	13.155	26.941	11.597	16.756	39.561	52.74	59.532
641	2.86	4.122	12.875	26.315	10.213	14.756	38.46	50.058	57.031
641.5	2.786	4.048	12.594	25.688	8.829	12.756	37.358	47.377	54.529
642	2.712	3.974	12.313	25.062	7.444	10.756	36.257	44.696	52.027
642.5	2.71	3.83	12.032	24.436	6.06	8.756	35.156	42.014	49.526
643	2.708	3.825	11.751	23.809	26.824	38.756	34.055	39.333	47.024
643.5	2.706	3.751	11.471	23.183	25.439	36.756	32.953	36.652	44.522
644	2.704	3.677	11.19	22.557	24.055	34.756	31.852	33.97	42.021
644.5	2.702	3.603	10.909	21.931	22.671	32.756	30.751	31.289	39.519
645	2.7	3.528	10.628	21.304	21.287	30.756	29.65	28.607	37.017
645.5	2.698	3.454	10.347	20.678	19.902	28.756	28.548	25.926	34.516
646	2.696	3.38	10.067	20.052	18.518	26.756	27.447	23.245	32.014
646.5	2.694	3.306	9.786	19.425	17.134	24.756	26.346	20.563	29.513
647	2.692	3.232	9.505	18.799	15.75	22.756	25.244	18.882	27.011
647.5	2.69	3.157	9.224	18.173	14.365	20.756	24.143	17.201	24.509
648	2.688	3.083	8.943	17.546	12.981	18.756	23.042	15.519	22.008
648.5	2.686	3.009	8.663	16.92	11.597	16.756	21.941	13.838	19.506
649	2.684	2.935	8.382	16.294	10.213	14.756	20.839	12.156	17.004
649.5	2.682	2.86	8.101	15.668	8.829	12.756	19.738	10.475	14.503
650	2.68	2.786	7.82	15.041	7.444	10.756	18.637	8.794	12.001
650.5	2.678	2.712	7.539	14.415	6.06	8.756	17.535	7.112	9.499
