# Supplementary material for: A novel method for sensitive detection of Escherichia coli O157:H7 based on an aptamer and hybridization chain reaction
Source: Royal Society of Chemistry journal article supplement (doi:10.1039/d0ay00708k), 2020-01-01
Supplement: d0ay00708k6.xlsx [file d0ay00708k6.xlsx]

## Sheet: Sheet1
2.4	540.515
3.4	1141.24
4.4	1513.38
5.4	2186.59
6.4	2842.96
7.4	3412.08
8.4	4100.75
