# Supplementary material for: A novel method for sensitive detection of Escherichia coli O157:H7 based on an aptamer and hybridization chain reaction
Source: Royal Society of Chemistry journal article supplement (doi:10.1039/d0ay00708k), 2020-01-01
Supplement: d0ay00708k7.xlsx [file d0ay00708k7.xlsx]

## Sheet: Sheet1
E. coli O157:H7 (CICC 21530)	3564.64	70
S.Typhi (CICC 21483)	120.234	40
S. aureus (CICC 10001)	90.43	36
P. aeruginosa (CICC 10351)	115.67	28
L. monocytogenes (CICC 10297)	65.786	25
B. subtilis (CICC 10732)	86.23	29
E. coli (CICC 10899)	1020.5	100
E. coli ETEC (CICC 10665)	378.24	50
E. coli EPEC (CICC 10663)	456.45	67
E. coli EIEC (CICC 10661)	323.3	56
Blank	59	27
